# Supplementary material
Source: PubMed Central journal article supplement (PMC7331901)
Supplement: NIHMS1590138-supplement-1.pdf [file NIHMS1590138-supplement-1.pdf]

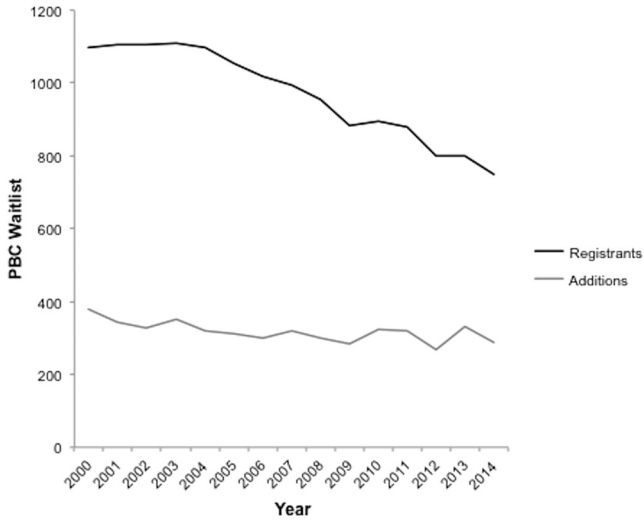

**Supplementary Figure 1.** Annual number of PBC liver transplant waitlist registrants within the United States from 2000 to 2014.

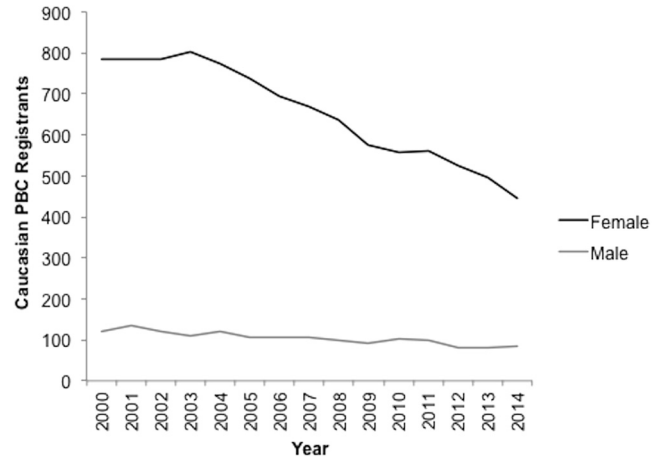

**Supplementary Figure 2.** Annual number of white PBC liver transplant waitlist registrants by gender within the United States from 2000 to 2014.

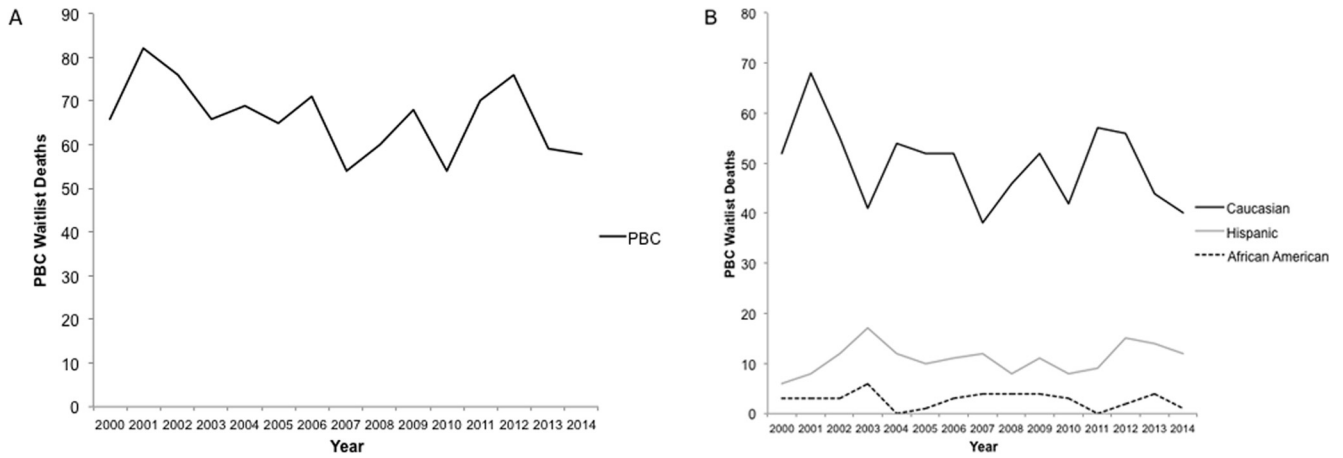

**Supplementary Figure 3.** Annual trends in PBC waitlist registrant deaths within the United States from 2000 to 2014. (A) Number of PBC waitlist registrant deaths. (B) Number of PBC waitlist registrant deaths by ethnicity/race.

**Supplementary Table 1.** Comparison of Health Insurance Status and Education Level Among PBC Registrants by Ethnicity/Race, OPTN/UNOS 2000–2014

|                          | All patients | White | Hispanic | African-American | Other | P value |
|--------------------------|--------------|-------|----------|------------------|-------|---------|
| Education level, %       |              |       |          |                  |       |         |
| Less than high school    | 5.2          | 0.2   | 22.1     | 1.6              | 0.5   | <.001   |
| High school/GED          | 44.8         | 44.2  | 48.1     | 45.5             | 41.3  | <.001   |
| College or post-graduate | 50.1         | 53.2  | 29.8     | 52.9             | 53.8  | <.001   |
| Insurance type (%)       |              |       |          |                  |       |         |
| Medicaid                 | 8.5          | 5.7   | 18.8     | 18.0             | 11.8  | <.001   |
| Private                  | 65.9         | 68.7  | 54.3     | 57.1             | 65.6  | <.001   |

OPTN/UNOS, Organ Procurement Transplant Network/United Network for Organ Sharing; PBC, primary biliary cholangitis.
